# Supplementary material for: Ingestion of taxifolin-rich foods affects brain activity, mental fatigue, and the whole blood transcriptome in healthy young adults: a randomized, double-blind, placebo-controlled, crossover study
Source: Royal Society of Chemistry journal article supplement (doi:10.1039/d2fo03151e), 2023-01-01
Supplement: d2fo03151e2.xlsx [file d2fo03151e2.xlsx]

## Sheet: Sheet1
Table S1 Eligibility criteria in this trial
Criteria	Description
Inclusion criteria	Healthy volunteer
	Males and females aged between 20 and 29
	Healthy volunteer
Exclusion criteria	Person participated in the previous "Survey Research of Indicators Relating to the Activity of the Brain Based on Functionality of Food(Taxifolin)"(19R-082)and carried out brain function-related index evaluation test CDB within 3 months before the start of this study
	Person who has a disorder that is an obstacle to this study
	The person in charge of research, Professor Yasuhiro Nishizaki, will be the person in charge of the course, in order not to affect the evaluation of academic work
	Others who are deemed inappropriate by the research leader or co-worker
