# Supplementary material for: Ingestion of taxifolin-rich foods affects brain activity, mental fatigue, and the whole blood transcriptome in healthy young adults: a randomized, double-blind, placebo-controlled, crossover study
Source: Royal Society of Chemistry journal article supplement (doi:10.1039/d2fo03151e), 2023-01-01
Supplement: d2fo03151e3.xlsx [file d2fo03151e3.xlsx]

## Sheet: Sheet1
Table S2 Measured scores for Cognitive measures tests (CMT: serial 3s, serial 7s and RVIP)
Test	Measures	Food	Sex	n	Scores of CMT before product ingestion	Scores of Cognitive measures tests (CMT) after product ingestion				p-value
					Pre	1st	2nd	3rd	4th	Food effect	Repetition effect	Food × Repetition
Serial 3s	Total answers (number)	Placebo	Male	13	71.0 ± 3.7	68.9 ± 4.8	68.9 ± 4.9	74.2 ± 2.9	76.8 ± 3.4	<0.001	0.004	0.76
		Taxifolin	Male	13	74.0 ± 6.4	76.9 ± 5.4	77.1 ± 4.3	77.9 ± 5.8	83.8 ± 5.2
		Placebo	Female	15	64.8 ± 5.6	69.3 ± 6.0	68.5 ± 4.4	75.5 ± 4.7	75.2 ± 4.6	0.112	0.02	0.367
		Taxifolin	Female	15	68.3 ± 4.7	72.7 ± 5.5	73.7 ± 5.4	73.5 ± 4.5	77.9 ± 4.9
		Placebo	Total	28	67.5 ± 3.7	69.1 ± 3.9	68.7 ± 3.2	74.9 ± 2.8	75.9 ± 2.9	<0.001	<0.001	0.245
		Taxifolin	Total	28	70.8 ± 3.8	74.6 ± 3.8	75.3 ± 3.5	75.6 ± 3.6	80.6 ± 3.5
	Correct answers (number)	Placebo	Male	13	68.9 ± 4.6	66.1 ± 5.1	66.2 ± 4.9	71.9 ± 2.8	74.0 ± 3.6	0.043	0.268	0.963
		Taxifolin	Male	13	72.0 ± 6.1	72.9 ± 5.3	74.7 ± 4.1	75.8 ± 5.8	81.8 ± 5.0
		Placebo	Female	15	63.0 ± 5.6	66.5 ± 6.4	65.0 ± 4.6	73.7 ± 4.8	72.6 ± 4.7	0.475	0.531	0.889
		Taxifolin	Female	15	66.7 ± 4.9	70.2 ± 5.7	70.7 ± 5.4	71.6 ± 4.5	75.8 ± 5.0
		Placebo	Total	28	65.6 ± 3.7	66.4 ± 4.1	65.6 ± 3.3	72.9 ± 2.8	73.3 ± 3.0	<0.001	<0.001	0.279
		Taxifolin	Total	28	69.1 ± 3.8	71.4 ± 3.9	72.6 ± 3.4	73.6 ± 3.6	78.6 ± 3.5
	Erroneous answers (number)	Placebo	Male	13	2.0 ± 0.6	2.8 ± 0.6	2.7 ± 0.5	2.3 ± 0.4	2.8 ± 0.7	0.929	0.218	0.373
		Taxifolin	Male	13	2.0 ± 0.6	4.0 ± 1.0	2.4 ± 0.7	2.1 ± 0.5	1.9 ± 0.5
		Placebo	Female	15	1.8 ± 0.4	2.7 ± 0.6	3.5 ± 1.4	1.7 ± 0.5	2.6 ± 0.7	0.583	0.233	0.94
		Taxifolin	Female	15	1.5 ± 0.3	2.5 ± 0.4	2.9 ± 0.4	1.9 ± 0.5	2.1 ± 0.4
		Placebo	Total	28	1.9 ± 0.3	2.8 ± 0.4	3.1 ± 0.8	2.0 ± 0.3	2.7 ± 0.5	0.546	0.047	0.536
		Taxifolin	Total	28	1.7 ± 0.3	3.2 ± 0.5	2.7 ± 0.4	2.0 ± 0.3	2.0 ± 0.3
	% of correct	Placebo	Male	13	97.1 ± 0.7	95.5 ± 1.2	95.9 ± 0.8	96.9 ± 0.5	96.2 ± 1.0	0.37	0.128	0.586
		Taxifolin	Male	13	97.5 ± 0.7	94.8 ± 1.3	97.0 ± 0.9	97.2 ± 0.7	97.8 ± 0.5
		Placebo	Female	15	96.9 ± 0.8	94.1 ± 2.5	94.6 ± 2.2	97.5 ± 0.8	96.4 ± 0.9	0.483	0.21	0.928
		Taxifolin	Female	15	97.2 ± 0.7	95.6 ± 1.0	95.6 ± 0.8	97.2 ± 0.7	96.9 ± 0.7
		Placebo	Total	28	97.0 ± 0.5	94.8 ± 1.4	95.2 ± 1.2	97.2 ± 0.5	96.3 ± 0.6	0.229	0.014	0.868
		Taxifolin	Total	28	97.4 ± 0.5	95.2 ± 0.8	96.2 ± 0.6	97.2 ± 0.5	97.3 ± 0.4
	Re-entries (number)	Placebo	Male	13	3.8 ± 0.6	4.8 ± 0.8	8.2 ± 1.5	8.0 ± 1.8	7.2 ± 1.6	0.649	0.337	0.849
		Taxifolin	Male	13	3.8 ± 1.1	6.8 ± 1.2	8.9 ± 2.3	7.7 ± 1.3	6.7 ± 1.1
		Placebo	Female	15	3.1 ± 0.9	5.3 ± 0.9	6.4 ± 1.1	7.1 ± 1.5	6.7 ± 1.2	0.087	0.376	0.97
		Taxifolin	Female	15	2.1 ± 0.5	4.0 ± 0.6	5.5 ± 0.9	5.3 ± 0.8	5.8 ± 0.9
		Placebo	Total	28	3.4 ± 0.6	5.1 ± 0.6	7.2 ± 0.9	7.5 ± 1.2	6.9 ± 1.0	0.338	0.016	0.764
		Taxifolin	Total	28	2.9 ± 0.6	5.3 ± 0.7	7.1 ± 1.2	6.4 ± 0.7	6.2 ± 0.7
	Time required to answers (msec)	Placebo	Male	13	1747.6 ± 104.0	1815.0 ± 108.5	1821.8 ± 118.3	1623.3 ± 62.1	1587.35	0.123	0.241	0.782
		Taxifolin	Male	13	1777.2 ± 200.4	1640.5 ± 118.9	1624.7 ± 115.8	1620.4 ± 111.3	1500.5 ± 108.1
		Placebo	Female	15	2131.1 ± 292.2	2031.0 ± 281.8	1881.0 ± 177.4	1708.1 ± 164.6	1689.0 ± 132.5	0.656	0.477	0.942
		Taxifolin	Female	15	1893.5 ± 159.9	1837.1 ± 189.6	1844.8 ± 244.3	1745.8 ± 146.2	1640.8 ± 132.2
		Placebo	Total	28	1960.7 ± 170.2	1930.8 ± 157.8	1853.5 ± 108.0	1668.7 ± 91.6	1641.8 ± 80.0	0.037	<0.001	0.359
		Taxifolin	Total	28	1841.8 ± 123.8	1749.7 ± 117.4	1742.6 ± 140.7	1687.6 ± 93.0	1575.7 ± 86.3
	Time required to correct answers (msec)	Placebo	Male	13	1680.6 ± 97.7	1758.4 ± 100.2	1661.5 ± 84.6	1554.3 ± 67.1	1542.1 ± 70.1	0.316	0.44	0.796
		Taxifolin	Male	13	1742.3 ± 202.5	1585.9 ± 119.3	1576.6 ± 121.9	1582.5 ± 111.8	1486.6 ± 110.6
		Placebo	Female	15	2087.9 ± 299.2	1951.5 ± 241.0	1795.3 ± 176.0	1672.2 ± 163.2	1663.3 ± 134.5	0.387	0.603	0.871
		Taxifolin	Female	15	1848.0 ± 148.7	1730.6 ± 145.7	1654.4 ± 133.7	1711.0 ± 139.2	1591.7 ± 118.5
		Placebo	Total	28	1906.9 ± 173.6	1861.8 ± 136.2	1733.2 ± 101.2	1617.5 ± 91.9	1607.0 ± 78.6	0.009	0.001	0.091
		Taxifolin	Total	28	1801.0 ± 120.1	1666.3 ± 96.0	1618.3 ± 89.9	1651.4 ± 90.1	1542.9 ± 80.8
Serial 7s	Total answers (number)	Placebo	Male	13	48.0 ± 4.8	46.9 ± 4.7	48.9 ± 4.7	49.2 ± 3.3	52.3 ± 4.9	0.058	0.003	0.882
		Taxifolin	Male	13	47.3 ± 4.3	48.1 ± 4.8	51.7 ± 4.9	50.6 ± 4.2	55.4 ± 4.7
		Placebo	Female	15	40.6 ± 3.9	41.9 ± 4.0	42.5 ± 3.5	44.3 ± 3.6	45.3 ± 3.9	0.132	0.015	0.907
		Taxifolin	Female	15	42.2 ± 3.5	43.3 ± 3.3	43.1 ± 3.2	45.7 ± 3.6	48.0 ± 3.4
		Placebo	Total	28	43.9 ± 3.1	44.2 ± 3.0	45.3 ± 2.9	46.6 ± 2.5	48.5 ± 3.1	0.015	<0.001	0.872
		Taxifolin	Total	28	44.4 ± 2.7	45.5 ± 2.9	47.1 ± 2.9	48.0 ± 2.7	51.4 ± 2.9
	Correct answers (number)	Placebo	Male	13	45.3 ± 4.5	43.5 ± 4.2	45.5 ± 4.3	45.5 ± 3.3	48.2 ± 4.5	0.091	0.007	0.736
		Taxifolin	Male	13	44.0 ± 3.9	44.1 ± 4.3	48.4 ± 4.4	46.3 ± 3.4	51.8 ± 4.4
		Placebo	Female	15	39.0 ± 4.0	39.6 ± 3.9	40.9 ± 3.6	42.1 ± 3.5	42.5 ± 3.8	0.2	0.109	0.824
		Taxifolin	Female	15	40.5 ± 3.3	41.3 ± 3.3	40.9 ± 3.1	43.2 ± 3.4	45.5 ± 3.3
		Placebo	Total	28	41.8 ± 3.0	41.4 ± 2.9	43.0 ± 2.7	43.6 ± 2.4	45.1 ± 2.9	0.035	0.001	0.749
		Taxifolin	Total	28	42.1 ± 2.5	42.6 ± 2.7	44.4 ± 2.7	44.6 ± 2.4	48.5 ± 2.7
	Erroneous answers (number)	Placebo	Male	13	2.8 ± 0.7	3.5 ± 0.7	3.4 ± 0.8	3.7 ± 0.6	4.2 ± 0.8	0.751	0.652	0.636
		Taxifolin	Male	13	3.3 ± 0.8	4.0 ± 0.9	3.3 ± 0.8	4.3 ± 0.9	3.5 ± 0.7
		Placebo	Female	15	1.6 ± 0.5	2.3 ± 0.6	1.5 ± 0.5	2.3 ± 0.6	2.7 ± 0.6	0.84	0.427	0.685
		Taxifolin	Female	15	1.7 ± 0.5	1.9 ± 0.4	2.2 ± 0.6	2.5 ± 0.6	2.5 ± 0.7
		Placebo	Total	28	2.1 ± 0.4	2.8 ± 0.4	2.4 ± 0.5	2.9 ± 0.4	3.4 ± 0.5	0.701	0.248	0.627
		Taxifolin	Total	28	2.4 ± 0.4	2.9 ± 0.5	2.7 ± 0.5	3.3 ± 0.5	3.0 ± 0.5
	% of correct	Placebo	Male	13	94.2 ± 1.6	92.8 ± 1.1	93.3 ± 1.3	92.2 ± 1.4	92.1 ± 1.5	0.781	0.532	0.657
		Taxifolin	Male	13	93.5 ± 1.2	91.4 ± 1.7	94.0 ± 1.1	92.1 ± 1.0	93.8 ± 0.9
		Placebo	Female	15	95.1 ± 2.1	93.7 ± 2.4	95.9 ± 1.5	94.8 ± 1.2	93.7 ± 1.3	0.747	0.812	0.78
		Taxifolin	Female	15	96.2 ± 1.0	94.9 ± 1.1	94.9 ± 1.6	94.6 ± 1.1	94.9 ± 1.5
		Placebo	Total	28	94.7 ± 1.3	93.3 ± 1.3	94.7 ± 1.0	93.6 ± 0.9	93.0 ± 1.0	0.675	0.472	0.756
		Taxifolin	Total	28	95.0 ± 0.8	93.3 ± 1.0	94.5 ± 1.0	93.5 ± 0.8	94.4 ± 0.9
	Re-entries (number)	Placebo	Male	13	3.3 ± 0.6	2.9 ± 0.6	3.8 ± 0.7	6.4 ± 2.3	4.0 ± 0.7	0.99	0.011	0.939
		Taxifolin	Male	13	3.1 ± 1.0	3.0 ± 0.5	4.5 ± 0.9	5.8 ± 1.4	3.8 ± 0.6
		Placebo	Female	15	2.9 ± 0.8	4.0 ± 1.0	3.7 ± 0.7	5.5 ± 1.3	4.8 ± 1.1	0.084	0.335	0.187
		Taxifolin	Female	15	2.1 ± 0.7	3.7 ± 0.9	3.9 ± 0.7	3.4 ± 1.4	4.3 ± 0.7
		Placebo	Total	28	3.1 ± 0.5	3.5 ± 0.6	3.7 ± 0.5	5.9 ± 1.2	4.4 ± 0.7	0.343	0.008	0.405
		Taxifolin	Total	28	2.6 ± 0.6	3.4 ± 0.5	4.2 ± 0.6	4.5 ± 0.7	4.1 ± 0.5
	Time required to answers (msec)	Placebo	Male	13	2712.1 ± 230.0	2798.7 ± 238.6	2635.1 ± 211.7	2533.1 ± 158.7	2500.4 ± 228.2	0.309	0.02	0.876
		Taxifolin	Male	13	2707.6 ± 211.4	2776.2 ± 329.1	2515.0 ± 213.9	2519.3 ± 210.2	2326.1 ± 190.2
		Placebo	Female	15	3404.1 ± 412.7	3499.3 ± 591.6	3114.2 ± 301.8	2983.1 ± 310.0	2963.4 ± 322.1	0.045	0.051	0.639
		Taxifolin	Female	15	3131.7 ± 313.4	3036.5 ± 304.9	3002.5 ± 262.4	2893.4 ± 298.7	2694.2 ± 242.6
		Placebo	Total	28	3096.6 ± 255.8	3174.0 ± 336.9	2901.3 ± 194.6	2774.2 ± 183.8	2748.4 ± 203.8	0.023	0.001	0.739
		Taxifolin	Total	28	2943.2 ± 198.8	2915.6 ± 220.8	2776.2 ± 175.4	2719.7 ± 187.6	2523.3 ± 158.3
	Time required to correct answers (msec)	Placebo	Male	13	2621.1 ± 216.0	2741.9 ± 248.1	2556.0 ± 211.5	2383.4 ± 153.3	2368.6 ± 211.2	0.299	0.007	0.803
		Taxifolin	Male	13	2668.0 ± 219.2	2648.3 ± 290.7	2389.1 ± 185.9	2414.1 ± 209.8	2296.9 ± 191.7
		Placebo	Female	15	3332.9 ± 403.0	3428.4 ± 582.0	3012.8 ± 288.8	2909.2 ± 322.0	2907.7 ± 339.5	0.03	0.063	0.563
		Taxifolin	Female	15	3084.3 ± 306.6	2941.0 ± 288.2	2865.8 ± 270.8	2837.2 ± 297.8	2652.5 ± 240.1
		Placebo	Total	28	3016.5 ± 249.3	3109.6 ± 333.4	2809.8 ± 188.0	2665.1 ± 190.3	2657.4 ± 209.5	0.016	0.001	0.545
		Taxifolin	Total	28	2899.3 ± 197.0	2805.1 ± 203.4	2644.5 ± 172.0	2640.8 ± 188.1	2487.4 ± 157.4
RVIP	Correct answers (number)	Placebo	Male	13	33.9 ± 1.3	33.0 ± 1.9	34.5 ± 2.1	33.3 ± 2.1	33.0 ± 2.3	0.755	0.933	0.96
		Taxifolin	Male	13	33.6 ± 2.0	34.2 ± 2.1	34.0 ± 2.4	34.7 ± 2.0	32.8 ± 2.5
		Placebo	Female	15	33.1 ± 1.2	34.4 ± 1.2	33.8 ± 1.8	33.0 ± 1.9	32.4 ± 1.9	0.725	0.721	0.998
		Taxifolin	Female	15	34.5 ± 1.4	34.7 ± 1.7	34.1 ± 1.5	33.3 ± 1.7	33.2 ± 1.4
		Placebo	Total	28	33.5 ± 0.9	33.8 ± 1.1	34.1 ± 1.4	33.1 ± 1.4	32.7 ± 1.5	0.634	0.751	0.988
		Taxifolin	Total	28	34.1 ± 1.4	34.5 ± 1.7	34.1 ± 1.5	33.9 ± 1.7	33.0 ± 1.4
	Erroneous answers (number)	Placebo	Male	13	0.5 ± 0.2	1.0 ± 0.2	1.1 ± 0.3	1.5 ± 0.5	1.5 ± 0.5	0.133	0.609	0.728
		Taxifolin	Male	13	0.5 ± 0.2	0.5 ± 0.2	0.9 ± 0.2	0.9 ± 0.4	1.2 ± 0.3
		Placebo	Female	15	0.5 ± 0.3	0.7 ± 0.4	0.9 ± 0.3	0.9 ± 0.5	1.1 ± 0.4	0.75	0.991	0.606
		Taxifolin	Female	15	0.4 ± 0.2	0.7 ± 0.3	1.2 ± 0.3	0.7 ± 0.3	1.1 ± 0.3
		Placebo	Total	28	0.5 ± 0.2	0.8 ± 0.2	1.0 ± 0.2	1.2 ± 0.4	1.3 ± 0.3	0.295	0.915	0.489
		Taxifolin	Total	28	0.4 ± 0.1	0.6 ± 0.2	1.1 ± 0.2	0.8 ± 0.2	1.1 ± 0.2
	% of correct	Placebo	Male	13	84.8 ± 3.4	82.5 ± 4.8	86.3 ± 5.3	83.3 ± 5.3	82.5 ± 5.7	0.755	0.933	0.96
		Taxifolin	Male	13	84.0 ± 5.1	85.6 ± 5.2	85.0 ± 5.9	86.7 ± 5.0	82.1 ± 6.2
		Placebo	Female	15	82.8 ± 3.1	86.0 ± 4.8	84.5 ± 4.5	82.5 ± 4.8	81.0 ± 4.8	0.725	0.721	0.998
		Taxifolin	Female	15	86.3 ± 3.6	86.7 ± 4.2	85.3 ± 3.8	83.2 ± 4.4	83.0 ± 3.4
		Placebo	Total	28	83.8 ± 2.2	84.4 ± 2.7	85.4 ± 3.4	82.9 ± 3.5	81.7 ± 3.6	0.634	0.751	0.988
		Taxifolin	Total	28	85.3 ± 3.0	86.2 ± 3.2	85.2 ± 3.4	84.8 ± 3.3	82.6 ± 3.3
	missed opportunities (number)	Placebo	Male	13	6.1 ± 1.3	7.0 ± 1.9	5.5 ± 2.1	6.7 ± 2.1	7.0 ± 2.3	0.755	0.933	0.96
		Taxifolin	Male	13	6.4 ± 2.0	5.8 ± 2.1	6.0 ± 2.4	5.3 ± 2.0	7.2 ± 2.5
		Placebo	Female	15	6.9 ± 1.2	5.6 ± 1.2	6.2 ± 1.8	7.0 ± 1.9	7.6 ± 1.9	0.725	0.721	0.998
		Taxifolin	Female	15	5.5 ± 1.4	5.3 ± 1.7	5.9 ± 1.5	6.7 ± 1.7	6.8 ± 1.4
		Placebo	Total	28	6.5 ± 0.9	6.3 ± 1.1	5.9 ± 1.4	6.9 ± 1.4	7.3 ± 1.5	0.634	0.751	0.988
		Taxifolin	Total	28	5.9 ± 1.2	5.5 ± 1.3	5.9 ± 1.3	6.1 ± 1.3	7.0 ± 1.3
	Response time (msec)	Placebo	Male	13	419.1 ± 15.0	434.7 ± 19.6	428.4 ± 15.7	429.5 ± 14.4	435.9 ± 15.7	0.448	0.948	0.964
		Taxifolin	Male	13	413.8 ± 14.1	432.4 ± 19.9	421.3 ± 13.9	422.8 ± 12.7	417.4 ± 14.8
		Placebo	Female	15	413.8 ± 13.2	421.6 ± 17.6	430.9 ± 22.7	413.6 ± 19.9	409.9 ± 15.3	0.801	0.741	0.928
		Taxifolin	Female	15	419.5 ± 18.3	404.9 ± 14.1	428.9 ± 23.6	411.2 ± 16.4	417.8 ± 14.7
		Placebo	Total	28	416.3 ± 9.8	427.7 ± 12.9	429.7 ± 13.9	421.0 ± 12.5	421.9 ± 11.1	0.505	0.891	0.994
		Taxifolin	Total	28	416.9 ± 11.6	417.7 ± 12.0	425.4 ± 14.0	416.6 ± 10.4	417.6 ± 10.3
Values are mean ± SE; p-values associated with food, repetition, and food × repetition effect after product ingestion are presented. The p-values in bold are statistically significant. *p <0.05; **p <0.01.
