# Supplementary material for: Ingestion of taxifolin-rich foods affects brain activity, mental fatigue, and the whole blood transcriptome in healthy young adults: a randomized, double-blind, placebo-controlled, crossover study
Source: Royal Society of Chemistry journal article supplement (doi:10.1039/d2fo03151e), 2023-01-01
Supplement: d2fo03151e4.xlsx [file d2fo03151e4.xlsx]

## Sheet: Sheet1
Table S3 Values of VAS
Measures	Treatment	Sex	n	Values of VAS before product ingestion		Values of VAS after product ingestion					p-value
				Pre-0	Pre-1	0	1st	2nd	3rd	4th	Food effect	Repetition effect	Food × Repetition
VAS	Placebo	Male	13	43.5 ± 5.4	50.3 ± 4.8	43.7 ± 5.4	52.5 ± 5.4	57.2 ± 5.7	63.1 ± 6.0	68.5 ± 6.2	0.061	<0.001	0.997
	Taxifolin	Male	13	40.2 ± 7.1	50.8 ± 6.1	41.4 ± 6.5	47.9 ± 4.5	53.7 ± 4.2	59.5 ± 4.1	64.6 ± 4.9
	Placebo	Female	15	32.7 ± 4.4	43.8 ± 3.9	37.9 ± 4.1	46.7 ± 3.9	51.2 ± 3.6	53.5 ± 4.3	61.0 ± 4.5	0.57	<0.001	0.406
	Taxifolin	Female	15	38.9 ± 5.4	46.7 ± 4.4	42.1 ± 4.6	46.6 ± 4.0	52.6 ± 4.6	55.8 ± 5.3	57.1 ± 5.1
	Placebo	Total	28	37.7 ± 3.5	46.8 ± 3.1	40.6 ± 3.3	49.4 ± 3.3	54.0 ± 3.3	58.0 ± 3.7	64.5 ± 3.7	0.278	<0.001	0.686
	Taxifolin	Total	28	39.5 ± 4.3	48.6 ± 3.6	41.8 ± 3.8	47.2 ± 2.9	53.1 ± 3.1	57.5 ± 3.4	60.6 ± 3.6
VAS required time (msec)	Placebo	Male	13	–	7740.8 ± 1743.4	–	7797.6 ± 1462.3	8058.9 ± 1193.3	7065.2 ± 1064.4	8039.4 ± 1253.4	0.155	0.852	0.993
	Taxifolin	Male	13	–	7141.5 ± 948.2	–	6969.8 ± 831.1	6805.5 ± 1185.0	6195.5 ± 501.5	6700.5 ± 592.5
	Placebo	Female	15	–	6629.3 ± 565.5	–	6531.0 ± 319.9	7225.1 ± 754.4	5687.9 ± 334.5	5412.0 ± 385.7	0.078	0.079	0.189
	Taxifolin	Female	15	–	7171.7 ± 582.7	–	5679.1 ± 256.1	5821.4 ± 356.4	5446.5 ± 278.6	5775.3 ± 486.0
	Placebo	Total	28	–	7145.3 ± 852.9	–	7119.1 ± 696.0	7612.3 ± 677	6327.4 ± 531.3	6631.9 ± 655.1	0.01	0.19	0.712
	Taxifolin	Total	28	–	7157.6 ± 529.0	–	6278.4 ± 419.6	6278.3 ± 577.9	5794.2 ± 280.4	6204.9 ± 382.0
Values are mean ± SE; p-values associated with food, repetition, and food × repetition effect after product ingestion are presented. The p-values in bold are statistically significant. Pre-0 and Pre-1 were before and after the practice CMT, respectively. 0 is before the actual CMT. 1st–4th represent the number of CMT repetitions.
