# Supplementary material for: Ingestion of taxifolin-rich foods affects brain activity, mental fatigue, and the whole blood transcriptome in healthy young adults: a randomized, double-blind, placebo-controlled, crossover study
Source: Royal Society of Chemistry journal article supplement (doi:10.1039/d2fo03151e), 2023-01-01
Supplement: d2fo03151e5.xlsx [file d2fo03151e5.xlsx]

## Sheet: Sheet1
Table S4 List of gene name in Table 2 and 3
Gene Symbol	Description
ANKRD36	Ankyrin repeat domain 36
ANKRD36B	Ankyrin repeat domain 36B
AP1S2	Adaptor Related Protein Complex 1 Subunit Sigma 2
APOBEC3C	Apolipoprotein B mRNA editing enzyme, catalytic polypeptide-like 3C
ARPC2	Actin-related protein 2/3 complex subunit 2
ASAH1	N-Acylsphingosine Amidohydrolase 1
ATP6V0A1	ATPase H+ Transporting V0 Subunit A1
ATP6V0E1	ATPase H+ Transporting V0 Subunit E1
CALR	Calreticulin
CD68	CD68 Molecule
CHP1	Calcineurin-like EF-hand protein 1
CORO1A	Coronin 1A
CTSA	Cathepsin A
CTSB	Cathepsin B
CTSD	Cathepsin D
CTSS	Cathepsin S
CTSW	Cathepsin W
CTSZ	Cathepsin Z
DCAF16	DDB1 and CUL4 associated factor 16
DDX39B	DEAD (Asp-Glu-Ala-Asp) box polypeptide 39B
DDX5	DEAD (Asp-Glu-Ala-Asp) box helicase 5
F11R	F11 receptor
FCGR2A	Fc Gamma Receptor IIa
FCGR2B	Fc Gamma Receptor IIb
G6PD	Glucose-6-phosphate dehydrogenase
GBA	Glucosylceramidase Beta
GPR65	G protein-coupled receptor 65
GZMK	Granzyme K
HNRNPM	Heterogeneous nuclear ribonucleoprotein M
IGF2R	Insulin Like Growth Factor 2 Receptor
LAMP2	Lysosomal Associated Membrane Protein 2
LAPTM5	Lysosomal Protein Transmembrane 5
LITAF	Lipopolysaccharide Induced TNF Factor
LYL1	Lymphoblastic leukemia associated hematopoiesis regulator 1
MATR3	Matrin 3
MCOLN1	Mucolipin TRP Cation Channel 1
MMD	Monocyte to macrophage differentiation-associated
MOB3A	MOB kinase activator 3A
NCF2	Neutrophil Cytosolic Factor 2
NOTCH2NL	Notch 2 N-terminal like
PHC2	Polyhomeotic homolog 2 (Drosophila)
PSAP	Prosaposin
RAB5C	RAB5C, Member RAS Oncogene Family
RAB7A	RAB7A, Member RAS Oncogene Family
RSRP1	Arginine/serine-rich protein 1
S1PR5	Sphingosine-1-phosphate receptor 5
SLC11A1	Solute Carrier Family 11 Member 1
SORT1	Sortilin 1
TCIRG1	T Cell Immune Regulator 1, ATPase H+ Transporting V0 Subunit A3
TFRC	Transferrin Receptor
TLR4	Toll Like Receptor 4
TUBA1A	Tubulin Alpha 1a
TUBB4B	Tubulin Beta 4B Class Ivb
ZNF107	Zinc finger protein 107
