# Supplementary figures and images for: Ingestion of taxifolin-rich foods affects brain activity, mental fatigue, and the whole blood transcriptome in healthy young adults: a randomized, double-blind, placebo-controlled, crossover study
Source: Royal Society of Chemistry journal article supplement (doi:10.1039/d2fo03151e), 2023-01-01

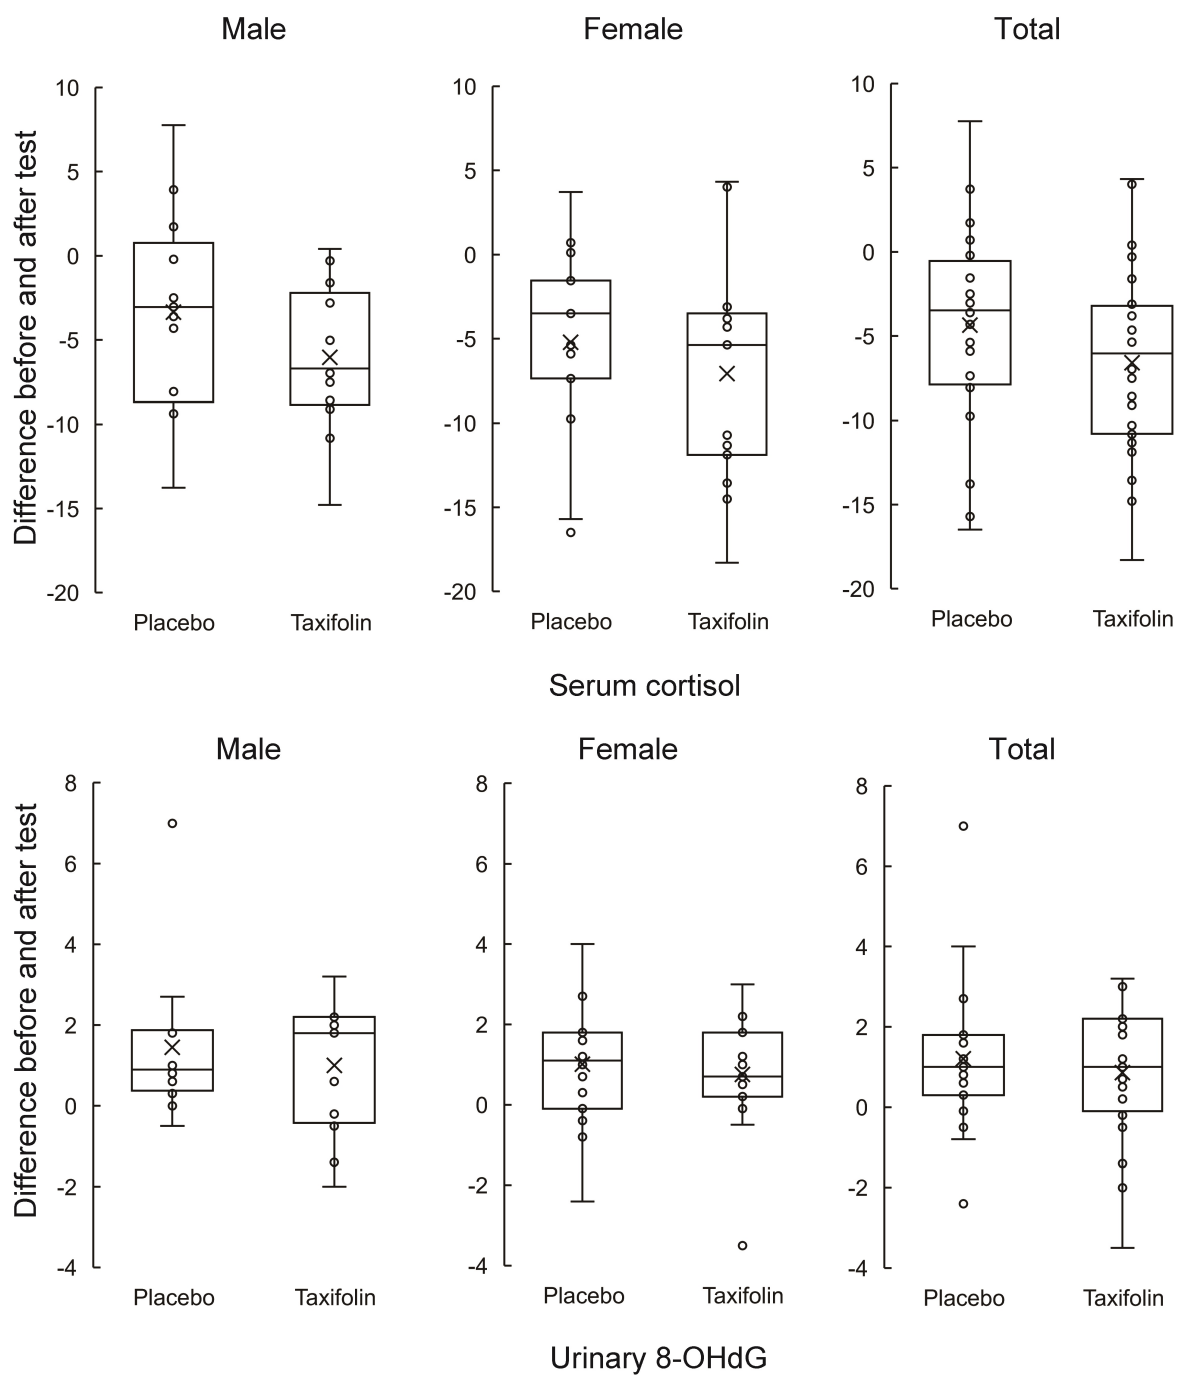

Fig S1 The change of serum cortisol and urinary 8-OHdG.

Supplement: d2fo03151e1.pdf [file d2fo03151e1.pdf]
